# Supplementary material for: Capreomycin and hygromycin B modulate the catalytic activity of the delta ribozyme in a manner that depends on the protonation and complexation with Cu2+ ions of these antibiotics
Source: Royal Society of Chemistry journal article supplement (doi:10.1039/c2dt30794d), 2012-01-01
Supplement: c2dt30794d.pdf [file c2dt30794d.pdf]

Supplementary Table 1. Species distribution for capreomycin and hygromycin B and their complexes with Cu<sup>2+</sup> ions in solution at pH 5.5, 6.5 and 7.5. The molar fractions of various species (in percentages) were taken from previously published data [20,21].

| Capreomycin complex  |                     | pH 5.5 | 6.5  | 7.5  |
|----------------------|---------------------|--------|------|------|
| Ligand               | H <sub>4</sub> L    | 84.1   | 33.8 | 3.4  |
|                      | H <sub>3</sub> L    | 15.9   | 63.6 | 69.0 |
|                      | H <sub>2</sub> L    | 0.0    | 2.6  | 27.6 |
| 0.05 mM              | CuH <sub>3</sub> L  | 1.2    | 4.8  | 0.0  |
|                      | CuH <sub>2</sub> L  | 0.0    | 2.8  | 0.1  |
|                      | CuHL                | 0.0    | 4.8  | 20.6 |
|                      | CuL                 | 0.0    | 2.16 | 48.3 |
|                      | CuH <sub>-1</sub> L | 0.0    | 0.0  | 12.1 |
| 0.1 mM               | CuH <sub>3</sub> L  | 2.4    | 6.4  | 0.0  |
|                      | CuH <sub>2</sub> L  | 0.0    | 4.6  | 0.0  |
|                      | CuHL                | 0.0    | 7.8  | 21.8 |
|                      | CuL                 | 0.0    | 1.8  | 51.1 |
|                      | CuH <sub>-1</sub> L | 0.0    | 0.0  | 12.8 |
| 0.2 mM               | CuH <sub>3</sub> L  | 4.5    | 9.6  | 0.0  |
|                      | CuH <sub>2</sub> L  | 0.0    | 6.9  | 1.3  |
|                      | CuHL                | 0.0    | 11.8 | 22.7 |
|                      | CuL                 | 0.0    | 2.8  | 53.2 |
|                      | CuH <sub>-1</sub> L | 0.0    | 0.0  | 13.4 |
| 0.5 mM               | CuH <sub>3</sub> L  | 10.1   | 14.4 | 0.0  |
|                      | CuH <sub>2</sub> L  | 0.0    | 10.4 | 1.4  |
|                      | CuHL                | 0.0    | 17.7 | 23.5 |
|                      | CuL                 | 0.0    | 4.14 | 55.1 |
|                      | CuH <sub>-1</sub> L | 0.0    | 0.0  | 13.8 |
| Hygromycin B complex |                     | pH 5.5 | 6.5  | 7.5  |
| Ligand               | H <sub>3</sub> L    | 96.3   | 71.1 | 17.4 |
|                      | H <sub>2</sub> L    | 3.7    | 28.0 | 65.4 |
|                      | HL                  | 0.0    | 0.9  | 17.2 |
| 0.1 mM               | CuH <sub>2</sub> L  | 4.3    | 5.6  | 0.0  |
|                      | CuHL                | 0.0    | 7.7  | 0.7  |
|                      | CuL                 | 0.0    | 43.4 | 41.5 |
|                      | CuH <sub>-1</sub> L | 0.0    | 5.59 | 53.5 |
| 0.3 mM               | CuH <sub>2</sub> L  | 10.9   | 6.8  | 0.0  |
|                      | CuHL                | 0.9    | 9.4  | 0.7  |
|                      | CuL                 | 0.9    | 53.0 | 42.0 |
|                      | CuH <sub>-1</sub> L | 0.0    | 6.8  | 54.1 |
| 1.0 mM               | CuH <sub>2</sub> L  | 25.8   | 8.1  | 0.6  |
|                      | CuHL                | 3.8    | 11.2 | 1.8  |
|                      | CuL                 | 2.1    | 62.8 | 42.5 |
|                      | CuH <sub>-1</sub> L | 0.0    | 8.1  | 54.8 |
